# Supplementary material for: Lentinan Impairs the Early Development of Zebrafish Embryos, Possibly by Disrupting Glucose and Lipid Metabolism
Source: MDPI journal article supplement (doi:10.3390/pr10010120), 2022-01-07
Supplement: s1 [file s1]

**Table S1.** The primer sequence pairs used in the qRT-PCR.

| Name                                                     | Symbol          | Assesion NO.   | Sequence of the primers (5'-3')                                       |
|----------------------------------------------------------|-----------------|----------------|-----------------------------------------------------------------------|
| actin, beta 2                                            | actb2           | NM_181601.5    | F: 5'- GCCTGACGGACAGGTCAT - 3'<br>R: 5'- ACCGCAAGATTCCATACCC - 3'     |
| pyruvate kinase                                          | pk              | NM_201289.1    | F: 5'- TCCTGGAGCATCTGTGTCTG - 3'<br>R: 5'-GTCTGGCGATGTTTCATTCCCT - 3' |
| glucokinase                                              | gk              | NM_001045385.2 | F: 5'- GCTGTGAAGTCGGCATGATA - 3'<br>R: 5'-CTTCAACCAGCTCCACCTTAC - 3'  |
| hexokinase 1                                             | hk              | NM_213252.1    | F: 5'- ACTTTGGGTGCAATCCTGAC - 3'<br>R: 5'- AGACGACGCACTGTTTTGTG - 3'  |
| peroxisome proliferator-activated receptor alpha         | ppar- $\alpha$  | NM_001161333.1 | F: 5'- CTGCGGGACATCTCTCAGTC - 3'<br>R: 5'- ACCGTAAACACCTGACGACG - 3'  |
| peroxisome proliferator-activated receptor gamma         | ppar- $\gamma$  | NM_131467.1    | F: 5'- CCTGTCCGGGAAGACCAGCG - 3'<br>R: 5'- GTGCTCGTGGAGCGGCATGT - 3'  |
| sterol regulatory element binding transcription factor 1 | srebp1 $\alpha$ | NM_001105129.1 | F: 5'- GCAGTTCATTAAGGCCGACT - 3'<br>R: 5'- GCTTCAGCTTCTGGTTGGAC - 3'  |
| carnitine palmitoyltransferase 1Aa                       | cpt1            | XM_005166473.4 | F: 5'- GCATTGACCTTCAGCTCAGC - 3'<br>R: 5'-CTGCCAACACCAGCACGAAC - 3'   |
| fatty acid binding protein 6, ileal (gastrotropin)       | fabp6           | NM_001002076.2 | F: 5'- CCCGCTCTTCTTCTCCGCTCA - 3'<br>R:5'-GTCACGGCCCTTTGCGATGACA-3'   |
| fatty acid synthase                                      | fas             | XM_009306807.3 | F: 5'- GGAGCAGGCTGCCTCTGTGC - 3'<br>R: 5'- TTGCGGCCTGTCCCACTCCT - 3'  |
| apolipoprotein A-IV b, tandem                            | apo             | NM_001079861.1 | F: 5'-AGCTGCACAATCCTCGTCTGC- 3'<br>R: 5'-TGCAGGAGCCTGTGTTTGCCT- 3'    |

|                                                       |         |                |                                                                             |
|-------------------------------------------------------|---------|----------------|-----------------------------------------------------------------------------|
| acyl-CoA oxidase 3, pristanoyl                        | aco     | NM_213147.1    | F: 5'- ACCTTTGGGATCATGGACTG - 3'<br>R: 5'- TGTTGTTTCGTGCCTCAAAG - 3'        |
| phosphoenolpyruvate carboxykinase 1 (soluble)         | pepck-c | NM_214751.1    | F: 5'- ATCACGCATCGCTAAAGAGG - 3'<br>R: 5'- CCGCTGCGAAATACTTCTTC - 3'        |
| 3-hydroxy-3-methylglutaryl-CoA reductase a            | hmgcra  | NM_001079977.2 | F: 5'- TCGTGGAGTGCCTGGTGATTGGT - 3'<br>R: 5'- TGGGTCTGCCTTCTCTGCTCTCTC - 3' |
| 3-hydroxy-3-methylglutaryl-CoA reductase b            | hmgcrb  | NM_001014292.2 | F: 5'-CTGCCGTTCTTCCTGCTGCTGATT - 3'<br>R:5'-GCCGACACCAATGACCAGACACTC-3'     |
| cytochrome P450, family 7, subfamily A, polypeptide 1 | cyp7a1  | NM_201173.2    | F:5'-CCTTCCTTGGCTGTGCTCTTCAGTT-3'<br>R:5'-AGGTGCCTTCCTTGACGGATGACA-3'       |
| low density lipoprotein receptor a                    | ldlr    | NM_001030283.1 | F: 5'- GCCAGCAAGGCCTGCAAAGC - 3'<br>R: 5'- CTTCAGGCGGGGGATGACGC - 3'        |

---
