# Supplementary material for: Lentinan Impairs the Early Development of Zebrafish Embryos, Possibly by Disrupting Glucose and Lipid Metabolism
Source: MDPI journal article supplement (doi:10.3390/pr10010120), 2022-01-07
Supplement: s1 [file s1]

**Table S2.** Effects of LNT on the GLU, TG and T-CHO in zebrafish larvae.

| Indexes             | LNT (μg/ml)   |                  |                 |                  |                  |
|---------------------|---------------|------------------|-----------------|------------------|------------------|
|                     | 0             | 30               | 100             | 300              | 900              |
| GLU (mmol/g prot)   | 0.196 ± 0.007 | 0.172 ± 0.008    | 0.127 ± 0.014*  | 0.102 ± 0.005*** | 0.031 ± 0.003*** |
| TG (mmol/g prot)    | 0.123 ± 0.009 | 0.116 ± 0.006    | 0.078 ± 0.008*  | 0.093 ± 0.001*   | 0.063 ± 0.007**  |
| T-CHO (mmol/g prot) | 0.118 ± 0.004 | 0.061 ± 0.004*** | 0.082 ± 0.006** | 0.079 ± 0.002*** | 0.047 ± 0.007*** |

The present values are the mean ± SEM (each group n=4), \*, p < 0.05; \*\*, p < 0.01; \*\*\*, p < 0.001 compared with control group.
